# Supplementary material
Source: Springer Nature journal article supplement (https://www.springermedizin.de/resource/supplementary/12913_2010_1384_MOESM4_ESM.pdf/9528022)
Supplement: MOESM4 [file 9528022]

Potentially relevant papers identified and screened for retrieval from electronic search: 628 in Medline, 1810 in EMBASE, 251 in Cochrane Library, 699 in PsycINFO, 248 in EconLit, 1984 in Web of Science, 32 based on reference list and citation tracking, 66 based on expert consultation.

(n = 5718)

Papers excluded on the basis of title review and abstract review (for obscure or unclear titles)

(n = 5328)

Studies reviewed in detail

(n = 390)

Papers excluded on the basis of full text review

(n = 212)

Reasons:

|              |     |
|--------------|-----|
| Population   | 9   |
| Intervention | 36  |
| Outcome      | 6   |
| Design       | 161 |

Studies included in final analysis

(n = 178)

Empirical papers excluded after quality appraisal

(n = 50)

Studies included in systematic review

(n = 128)
